# Supplementary material for: Depression, diabetes, comorbid depression and diabetes and risk of all-cause and cause-specific mortality: a prospective cohort study
Source: PubMed Central journal article supplement (PMC9345808; doi:10.1007/s00125-022-05723-4), 2022-05-27
Supplement: 125_2022_5723_MOESM1_ESM.pdf [file 125_2022_5723_MOESM1_ESM.pdf]

## **Electronic supplementary material**

### ESM methods: Ascertainment of covariates

The following covariates were ascertained through self-report in the touchscreen questionnaire at the baseline assessment. Income was defined as average household income before tax, with participants selecting one of five categories. Education was defined as highest educational attainment, which we categorized into: College or university degree; A level, O level, Certificate of Secondary Education or National Vocational Qualification, or equivalent; and none of the above). Area-based deprivation was assessed through the Townsend Deprivation Index (1), which we divided into fifths for this study. Due to small numbers of participants with a non-white ethnicity, we categorised ethnicity as white or other ethnicity. We categorised smoking as never, previous, or current smoker. We defined alcohol intake as safe drinking if men or women consumed  $\leq 14$  units of alcohol per week and as risky drinking if alcohol intake exceeded 14 units per week (2). In accordance with the International Physical Activity Questionnaire (3), we assigned level of physical activity as low, moderate or high. We classified oily fish intake as at least once a week, less than once per week, and never. We used information on daily fruit and vegetable intake to define consumption of at least five fruits or vegetables per day (4). Family history of stroke, heart disease, high blood pressure, and severe depression were defined as self-reported illness of mother or father. We calculated body mass index ( $\text{kg}/\text{m}^2$ , BMI) based on measured height and weight ascertained at the assessment centre at baseline, and categorised this as: under- or normal weight ( $<18.5 - 24.9 \text{ kg}/\text{m}^2$ ); overweight ( $25 - 29.9 \text{ kg}/\text{m}^2$ ); obese ( $30 - 34.9 \text{ kg}/\text{m}^2$ ); severely obese ( $35 - 39.9 \text{ kg}/\text{m}^2$ ); and morbidly obese ( $\geq 40 \text{ kg}/\text{m}^2$ ). Since there were so few participants underweight (0.5% of all participants included in the analysis), these were included in the same category as normal weight. We defined

hypertension and high cholesterol level as diagnosis and/or treatment, ascertained through self-report in the touchscreen questionnaire or nurse interview. Additionally, we identified participants with hypertension through blood pressure measurements of  $\geq 140/90$  mmHg at the assessment centre at baseline. We ascertained history of CVD (stroke, myocardial infarction, angina or transient ischaemic attack) and history of cancer using responses to the touchscreen questionnaire and nurse interview, and from linked hospital admission records prior to baseline.

## References

1. Townsend P: Deprivation. *Journal of Social Policy* 1987; 16:125-146
2. Department of Health (Ed.). UK Chief Medical Officers' Low Risk Drinking Guidelines 2016
3. Guidelines for Data Processing and Analysis of the International Physical Activity Questionnaire (IPAQ) - Short Form [article online], 2010. Available from <https://sites.google.com/site/theipaq/scoring-protocol>. Accessed 23/10/2017
4. World Health Organization (Ed.). Fruit and vegetables for health: report of the Joint FAO/WHO Workshop on Fruit and Vegetables for Health, 1-3 September 2004, Kobe, Japan. Geneva, 2005

ESM Table 1: HRs (95% CIs) for CVD mortality risk among UK Biobank participants with neither, one or both of depression and diabetes with truncation of follow-up at six years

| Cause of mortality | Exposure                        | Unadjusted HR (95%CI) | Adjusted HR (95%CI)  |                      |
|--------------------|---------------------------------|-----------------------|----------------------|----------------------|
|                    |                                 |                       | Model 1 <sup>a</sup> | Model 2 <sup>b</sup> |
| CVD mortality      | Neither depression nor diabetes | 1.0                   | 1.0                  | 1.0                  |
|                    | Depression alone                | 1.41 (1.14 – 1.74)    | 1.51 (1.22 – 1.87)   | 1.24 (1.00 – 1.54)   |
|                    | Diabetes alone                  | 4.94 (4.19 – 5.83)    | 2.74 (2.31 – 3.24)   | 1.95 (1.62 – 2.34)   |
|                    | Depression and diabetes         | 9.39 (6.97 – 12.64)   | 5.25 (3.88 – 7.09)   | 3.00 (2.19 – 4.11)   |

a Model 1: adjusted for age, sex, ethnicity, education, income and area-based deprivation

b Model 2: adjusted as in model 1 plus for BMI, physical activity level, alcohol intake, smoking status, fruit and vegetable intake, oily fish intake, high cholesterol level, hypertension, history of CVD, history of cancer, family history of CVD and family history of depression at baseline

ESM Table 2: Baseline characteristics and causes of death, separately for UK Biobank participants with and without complete data available

| <b>Characteristic</b>                                                | <b>Incomplete cases<br/>(N = 155,761)</b> | <b>Complete cases<br/>(N = 344,069)</b> |
|----------------------------------------------------------------------|-------------------------------------------|-----------------------------------------|
| <b>Men</b>                                                           | 57,446 (36.9)                             | 170,348 (49.5)                          |
| <b>Age (years), median (IQR)</b>                                     | 59.0 (51.0, 64.0)                         | 57.0 (50.0, 63.0)                       |
| <b>White ethnicity</b>                                               | 141,511 (90.9)                            | 328771 (95.6)                           |
| <b>Income (£)</b>                                                    |                                           |                                         |
| > 100,000                                                            | 1766 (2.2)                                | 21,119 (6.1)                            |
| 52,000 – 100,000                                                     | 10,284 (13.0)                             | 75,791 (22.0)                           |
| 31,000 – 51,999                                                      | 18,622 (23.5)                             | 91,852 (26.7)                           |
| 18,000 – 30,999                                                      | 22,108 (27.9)                             | 85,635 (24.9)                           |
| < 18,000                                                             | 26,364 (33.3)                             | 69,672 (20.2)                           |
| <b>Highest educational attainment</b>                                |                                           |                                         |
| College or university degree                                         | 32,666 (22.4)                             | 127,578 (37.1)                          |
| Other degrees <sup>a</sup>                                           | 74,374 (51.0)                             | 170,370 (49.5)                          |
| None of the above                                                    | 38,653 (26.5)                             | 46,121 (13.4)                           |
| <b>Area-based deprivation</b>                                        |                                           |                                         |
| 1 = least deprived                                                   | 28,679 (18.5)                             | 71,716 (20.8)                           |
| 2                                                                    | 28,929 (18.6)                             | 70,868 (20.6)                           |
| 3                                                                    | 29,983 (19.3)                             | 70,022 (20.4)                           |
| 4                                                                    | 30,356 (19.6)                             | 69,485 (20.2)                           |
| 5 = most deprived                                                    | 37,196 (24.0)                             | 61,978 (18.0)                           |
| <b>BMI</b>                                                           |                                           |                                         |
| Underweight or normal weight                                         | 47,239 (30.9)                             | 117,085 (34.0)                          |
| Overweight                                                           | 61,893 (40.5)                             | 149,255 (43.4)                          |
| Obese                                                                | 29,546 (19.3)                             | 57,393 (16.7)                           |
| Severely obese                                                       | 9730 (6.4)                                | 15,029 (4.4)                            |
| Morbidly obese                                                       | 4285 (2.8)                                | 5307 (1.5)                              |
| <b>Physical activity</b>                                             |                                           |                                         |
| High                                                                 | 45,348 (34.0)                             | 129,581 (37.7)                          |
| Moderate                                                             | 52,871 (39.6)                             | 141,478 (41.1)                          |
| Low                                                                  | 35,241 (26.4)                             | 73,010 (21.2)                           |
| <b>Alcohol intake = Risky drinking</b>                               | 29,266 (38.6)                             | 170,009 (49.4)                          |
| <b>Smoking status</b>                                                |                                           |                                         |
| Never                                                                | 87,498 (57.2)                             | 184,918 (53.7)                          |
| Previous                                                             | 47,500 (31.1)                             | 124,732 (36.3)                          |
| Current                                                              | 17,847 (11.7)                             | 34,419 (10.0)                           |
| <b>Fruit and vegetable intake per day<br/>= Less than five a day</b> | 104,873 (68.1)                            | 241,968 (70.3)                          |
| <b>Oily fish intake</b>                                              |                                           |                                         |
| At least once a week                                                 | 82,387 (54.3)                             | 194,921 (56.7)                          |
| Less than once a week                                                | 49,238 (32.4)                             | 114,824 (33.4)                          |
| Never                                                                | 20,115 (13.3)                             | 34,324 (10.0)                           |
| <b>History of CVD</b>                                                | 13,067 (8.4)                              | 22,470 (6.5)                            |
| <b>History of cancer</b>                                             | 14,498 (9.3)                              | 29,828 (8.7)                            |
| <b>Hypertension</b>                                                  | 91,238 (58.6)                             | 191,015 (55.5)                          |
| <b>High cholesterol level</b>                                        | 32,544 (20.9)                             | 62,926 (18.3)                           |
| <b>Family history of CVD</b>                                         | 106,112 (68.1)                            | 239,848 (69.7)                          |
| <b>Family history of depression</b>                                  | 12,656 (8.1)                              | 31,425 (9.1)                            |
| <b>Cause of death</b>                                                |                                           |                                         |
| Cancer                                                               | 2872 (1.8)                                | 5104 (1.5)                              |
| Circulatory disease                                                  | 1079 (0.7)                                | 1748 (0.5)                              |
| Other causes                                                         | 1212 (0.8)                                | 1709 (0.5)                              |

Data are number (%) unless otherwise indicated.

<sup>a</sup> A level, O level, Certificate of secondary education, National vocational qualification, or equivalent

ESM Table 3: HRs (95% CIs) for all-cause and cause-specific mortality risk among UK Biobank participants with neither, one of both of depression and diabetes (complete case analysis)

| Causes of mortality                | Exposure                        | Unadjusted HR (95% CI) | Adjusted HR (95% CI) |                      |
|------------------------------------|---------------------------------|------------------------|----------------------|----------------------|
|                                    |                                 |                        | Model 1 <sup>a</sup> | Model 2 <sup>b</sup> |
| <b>All-cause mortality</b>         | Neither depression nor diabetes | 1.0                    | 1.0                  | 1.0                  |
|                                    | Depression alone                | 1.36 (1.26 – 1.46)     | 1.37 (1.27 – 1.47)   | 1.19 (1.11 – 1.29)   |
|                                    | Diabetes alone                  | 2.81 (2.61 – 3.02)     | 1.79 (1.67 – 1.93)   | 1.56 (1.45 – 1.69)   |
|                                    | Depression and diabetes         | 4.69 (4.07 – 5.41)     | 3.02 (2.62 – 3.48)   | 2.32 (2.00 – 2.69)   |
| <b>Cancer mortality</b>            | Neither depression nor diabetes | 1.0                    | 1.0                  | 1.0                  |
|                                    | Depression alone                | 1.05 (0.94 – 1.16)     | 1.05 (0.94 – 1.16)   | 0.93 (0.83 – 1.03)   |
|                                    | Diabetes alone                  | 2.00 (1.80 – 2.22)     | 1.36 (1.23 – 1.52)   | 1.28 (1.14 – 1.43)   |
|                                    | Depression and diabetes         | 2.82 (2.24 – 3.54)     | 1.96 (1.56 – 2.47)   | 1.70 (1.35 – 2.15)   |
| <b>Circulatory mortality</b>       | Neither depression nor diabetes | 1.0                    | 1.0                  | 1.0                  |
|                                    | Depression alone                | 1.37 (1.16 – 1.62)     | 1.47 (1.24 – 1.74)   | 1.22 (1.02 – 1.44)   |
|                                    | Diabetes alone                  | 4.71 (4.13 – 5.38)     | 2.61 (2.28 – 2.99)   | 1.82 (1.57 – 2.10)   |
|                                    | Depression and diabetes         | 7.55 (5.83 – 9.79)     | 4.31 (3.32 – 5.59)   | 2.41 (1.84 – 3.16)   |
| <b>Mortality from other causes</b> | Neither depression nor diabetes | 1.0                    | 1.0                  | 1.0                  |
|                                    | Depression alone                | 2.47 (2.16 – 2.82)     | 2.37 (2.07 – 2.72)   | 2.11 (1.84 – 2.43)   |
|                                    | Diabetes alone                  | 3.68 (3.16 – 4.28)     | 2.24 (1.92 – 2.61)   | 2.10 (1.77 – 2.48)   |
|                                    | Depression and diabetes         | 8.36 (6.47 – 10.79)    | 4.83 (3.73 – 6.25)   | 3.85 (2.93 – 5.06)   |

a Model 1: adjusted for age, sex, ethnicity, education, income and area-based deprivation

b Model 2: adjusted as in model 1 plus for BMI, physical activity level, alcohol intake, smoking status, fruit and vegetable intake, oily fish intake, high cholesterol level, hypertension, history of CVD, history of cancer, family history of CVD and family history of depression at baseline

ESM Table 4: HRs (95% CIs) for all-cause and cause-specific mortality risk among UK Biobank participants with neither, one or both of depression and diabetes stratified by sex (complete case analysis)

| Causes of mortality         | Exposure                        | Adjusted HR (95% CI) <sup>a</sup> |                    |
|-----------------------------|---------------------------------|-----------------------------------|--------------------|
|                             |                                 | Men                               | Women              |
| All-cause mortality         | Neither depression nor diabetes | 1.0                               | 1.0                |
|                             | Depression alone                | 1.24 (1.12 – 1.38)                | 1.15 (1.03 – 1.29) |
|                             | Diabetes alone                  | 1.58 (1.44 – 1.72)                | 1.53 (1.28 – 1.83) |
|                             | Depression and diabetes         | 2.40 (2.02 – 2.84)                | 2.09 (1.56 – 2.81) |
| Cancer mortality            | Neither depression nor diabetes | 1.0                               | 1.0                |
|                             | Depression alone                | 0.87 (0.73 – 1.02)                | 0.99 (0.86 – 1.14) |
|                             | Diabetes alone                  | 1.28 (1.12 – 1.46)                | 1.27 (1.01 – 1.60) |
|                             | Depression and diabetes         | 1.86 (1.41 – 2.45)                | 1.38 (0.88 – 2.17) |
| Circulatory mortality       | Neither depression nor diabetes | 1.0                               | 1.0                |
|                             | Depression alone                | 1.30 (1.06 – 1.59)                | 1.03 (0.74 – 1.43) |
|                             | Diabetes alone                  | 1.75 (1.50 – 2.06)                | 2.35 (1.62 – 3.40) |
|                             | Depression and diabetes         | 2.53 (1.88 – 3.40)                | 1.95 (0.97 – 3.92) |
| Mortality from other causes | Neither depression nor diabetes | 1.0                               | 1.0                |
|                             | Depression alone                | 2.16 (1.81 – 2.58)                | 2.01 (1.61 – 2.52) |
|                             | Diabetes alone                  | 2.18 (1.81 – 2.63)                | 1.84 (1.22 – 2.76) |
|                             | Depression and diabetes         | 3.49 (2.51 – 4.84)                | 4.76 (2.91 – 7.80) |

a Fully adjusted model: adjusted for age, ethnicity, education, income and area-based deprivation, BMI, physical activity level, alcohol intake, smoking status, fruit and vegetable intake, oily fish intake, high cholesterol level, hypertension, history of CVD, history of cancer, family history of CVD and family history of depression at baseline

ESM Table 5: Measures of additive and multiplicative interaction between depression and diabetes on risk of all-cause and cause-specific mortality (complete case analysis)

| Causes of mortality           | Additive interaction |                     |                    | Multiplicative interaction |
|-------------------------------|----------------------|---------------------|--------------------|----------------------------|
|                               | RERI (CI)            | AP (CI)             | S (CI)             | p-value                    |
| All-cause mortality           | 0.56 (0.21 – 0.92)   | 0.24 (0.12 – 0.36)  | 1.74 (1.28 – 2.37) | 0.003                      |
| Cancer mortality              | 0.38 (-0.30 – 1.06)  | 0.16 (-0.09 – 0.40) | 1.37 (0.81 – 2.31) | 0.005                      |
| Circulatory mortality         | 0.50 (0.08 – 0.92)   | 1.37 (0.81 – 2.31)  | 3.47 (1.27 – 9.49) | 0.294                      |
| Mortality from other causes   | 0.64 (-0.41 – 1.70)  | 0.17 (-0.07 – 0.40) | 1.29 (0.88 – 1.90) | 0.658                      |
| CVD mortality                 | 0.45 (-0.38 – 1.28)  | 0.17 (-0.10 – 0.44) | 1.38 (0.80 – 2.36) | 0.321                      |
| Non-CVD circulatory mortality | 0.17 (-0.99 – 1.32)  | 0.10 (-0.52 – 0.72) | 1.30 (0.23 – 7.41) | 0.697                      |

AP: Attributable proportion, RERI: Relative excess risk for interaction, S: Synergy index

ESM Table 6: HRs (95% CIs) for CVD- and non-CVD circulatory mortality risk among UK Biobank participants with neither, one or both of depression and diabetes (complete case analysis)

| Causes of mortality                  | Exposure                        | Unadjusted HR (95%CI) | Adjusted HR (95%CI)  |                      |
|--------------------------------------|---------------------------------|-----------------------|----------------------|----------------------|
|                                      |                                 |                       | Model 1 <sup>a</sup> | Model 2 <sup>b</sup> |
| <b>CVD mortality</b>                 | Neither depression nor diabetes | 1.0                   | 1.0                  | 1.0                  |
|                                      | Depression alone                | 1.37 (1.13 – 1.67)    | 1.47 (1.21 – 1.79)   | 1.20 (0.98 – 1.46)   |
|                                      | Diabetes alone                  | 5.25 (4.53 – 6.08)    | 2.87 (2.47 – 3.34)   | 2.00 (1.70 – 2.36)   |
|                                      | Depression and diabetes         | 8.43 (6.32 – 11.23)   | 4.69 (3.51 – 6.27)   | 2.65 (1.96 – 3.59)   |
| <b>Non-CVD circulatory mortality</b> | Neither depression nor diabetes | 1.0                   | 1.0                  | 1.0                  |
|                                      | Depression alone                | 1.36 (0.98 – 1.88)    | 1.48 (1.07 – 2.06)   | 1.27 (0.91 – 1.78)   |
|                                      | Diabetes alone                  | 3.24 (2.40 – 4.37)    | 1.87 (1.38 – 2.54)   | 1.27 (0.92 – 1.77)   |
|                                      | Depression and diabetes         | 5.17 (2.84 – 9.43)    | 3.16 (1.73 – 5.79)   | 1.71 (0.92 – 3.20)   |

a Model 1: adjusted for age, sex, ethnicity, education, income and area-based deprivation

b Model 2: adjusted as in model 1 plus for BMI, physical activity level, alcohol intake, smoking status, fruit and vegetable intake, oily fish intake, high cholesterol level, hypertension, history of CVD, history of cancer, family history of CVD and family history of depression at baseline

ESM Table 7: Causes of death in the other mortality group, overall and separately for participants with none, one or both of depression and diabetes (n, %)

| <b>Causes of death</b>                                                                              | <b>Neither depression nor diabetes<br/>(N = 1,962)</b> | <b>Depression alone<br/>(N = 468)</b> | <b>Diabetes alone<br/>(N = 380)</b> | <b>Depression and diabetes<br/>(N = 111)</b> | <b>Total<br/>(N = 2,921)</b> |
|-----------------------------------------------------------------------------------------------------|--------------------------------------------------------|---------------------------------------|-------------------------------------|----------------------------------------------|------------------------------|
| Diseases of the respiratory system                                                                  | 517 (26.4%)                                            | 132 (28.2%)                           | 101 (26.6%)                         | 24 (21.6%)                                   | 774 (26.5%)                  |
| Diseases of the digestive system                                                                    | 343 (17.5%)                                            | 88 (18.8%)                            | 76 (20.0%)                          | 23 (20.7%)                                   | 530 (18.1%)                  |
| External causes of morbidity and mortality                                                          | 320 (16.3%)                                            | 107 (22.9%)                           | 37 (9.7%)                           | 10 (9.0%)                                    | 474 (16.2%)                  |
| Diseases of the nervous system                                                                      | 325 (16.6%)                                            | 59 (12.6%)                            | 31 (8.2%)                           | 11 (9.9%)                                    | 426 (14.6%)                  |
| Certain infectious and parasitic diseases                                                           | 90 (4.6%)                                              | 12 (2.6%)                             | 14 (3.7%)                           | 3 (2.7%)                                     | 119 (4.1%)                   |
| Endocrine, nutritional and metabolic diseases                                                       | 36 (1.8%)                                              | 7 (1.5%)                              | 58 (15.3%)                          | 18 (16.2%)                                   | 119 (4.1%)                   |
| Mental and behavioural disorders                                                                    | 69 (3.5%)                                              | 16 (3.4%)                             | 9 (2.4%)                            | 1 (0.9%)                                     | 95 (3.3%)                    |
| Neoplasms (in situ, benign, uncertain or unknown behaviour)                                         | 64 (3.3%)                                              | 9 (1.9%)                              | 9 (2.4%)                            | 3 (2.7%)                                     | 85 (2.9%)                    |
| Diseases of the musculoskeletal system and connective tissue                                        | 57 (2.9%)                                              | 13 (2.8%)                             | 7 (1.8%)                            | 5 (4.5%)                                     | 82 (2.8%)                    |
| Diseases of the genitourinary system                                                                | 37 (1.9%)                                              | 7 (1.5%)                              | 21 (5.5%)                           | 6 (5.4%)                                     | 71 (2.4%)                    |
| Symptoms, signs and abnormal clinical and laboratory findings, not elsewhere classified             | 43 (2.2%)                                              | 8 (1.7%)                              | 10 (2.6%)                           | 4 (3.6%)                                     | 65 (2.2%)                    |
| Diseases of the blood and blood-forming organs and certain disorders involving the immune mechanism | 20 (1.0%)                                              | 2 (0.4%)                              | 5 (1.3%)                            | 1 (0.9%)                                     | 28 (1.0%)                    |
| Congenital malformations, deformations and chromosomal abnormalities                                | 22 (1.1%)                                              | 4 (0.9%)                              | 1 (0.3%)                            | 0 (0.0%)                                     | 27 (0.9%)                    |
| Other death (temporary code)                                                                        | 12 (0.6%)                                              | 1 (0.2%)                              | 0 (0.0%)                            | 1 (0.9%)                                     | 14 (0.5%)                    |
| Diseases of the skin and subcutaneous tissue                                                        | 7 (0.4%)                                               | 3 (0.6%)                              | 1 (0.3%)                            | 1 (0.9%)                                     | 12 (0.4%)                    |

ESM Table 8: Measures of additive and multiplicative interaction between depression and diabetes on risk of all-cause and cause-specific mortality

|                                      | Additive interaction |                      |                    | Multiplicative interaction |
|--------------------------------------|----------------------|----------------------|--------------------|----------------------------|
|                                      | <i>RERI (CI)</i>     | <i>AP (CI)</i>       | <i>S (CI)</i>      | <i>p-value</i>             |
| <b>All-cause mortality</b>           | 0.29 (0.03 – 0.54)   | 0.13 (0.03 – 0.24)   | 1.32 (1.05 – 1.67) | 0.182                      |
| <b>Cancer mortality</b>              | 0.38 (0.07 – 0.68)   | 0.23 (0.08 – 0.39)   | 2.57 (1.27 – 5.23) | 0.006                      |
| <b>Circulatory mortality</b>         | -0.03 (-0.52 – 0.46) | -0.01 (-0.24 – 0.21) | 0.98 (0.65 – 1.46) | 0.578                      |
| <b>Mortality from other causes</b>   | 0.26 (-0.48 – 1.01)  | 0.07 (-0.12 – 0.27)  | 1.11 (0.83 – 1.49) | 0.061                      |
| <b>CVD mortality</b>                 | -0.26 (-0.85 – 0.33) | -0.11 (-0.39 – 0.17) | 0.83 (0.54 – 1.29) | 0.197                      |
| <b>Non-CVD circulatory mortality</b> | 0.57 (-0.31 – 1.46)  | 0.29 (-0.06 – 0.63)  | 2.33 (0.68 – 7.98) | 0.177                      |

AP: Attributable proportion, RERI: Relative excess risk for interaction, S: Synergy index

ESM Table 9: HRs (95% CIs) for CVD- and non-CVD circulatory mortality risk among UK Biobank participants with neither, one of both of depression and diabetes

| Causes of mortality                  | Exposure                        | Unadjusted HR (95%CI) | Adjusted HR (95%CI)  |                      |
|--------------------------------------|---------------------------------|-----------------------|----------------------|----------------------|
|                                      |                                 |                       | Model 1 <sup>a</sup> | Model 2 <sup>b</sup> |
| <b>CVD mortality</b>                 | Neither depression nor diabetes | 1.0                   | 1.0                  | 1.0                  |
|                                      | Depression alone                | 1.52 (1.32 – 1.76)    | 1.62 (1.39 – 1.88)   | 1.30 (1.12 – 1.52)   |
|                                      | Diabetes alone                  | 5.82 (5.21 – 6.49)    | 3.27 (2.92 – 3.66)   | 2.25 (1.99 – 2.55)   |
|                                      | Depression and diabetes         | 6.96 (5.54 – 8.75)    | 4.20 (3.33 – 5.29)   | 2.29 (1.80 – 2.92)   |
| <b>Non-CVD circulatory mortality</b> | Neither depression nor diabetes | 1.0                   | 1.0                  | 1.0                  |
|                                      | Depression alone                | 1.33 (1.04 – 1.71)    | 1.41 (1.09 – 1.81)   | 1.19 (0.92 – 1.54)   |
|                                      | Diabetes alone                  | 3.07 (2.45 – 3.86)    | 1.88 (1.49 – 2.37)   | 1.24 (0.96 – 1.59)   |
|                                      | Depression and diabetes         | 5.89 (3.97 – 8.74)    | 3.92 (2.63 – 5.83)   | 2.00 (1.31 – 3.06)   |

<sup>a</sup> Model 1: adjusted for age, sex, ethnicity, education, income and area-based deprivation

<sup>b</sup> Model 2: adjusted as in model 1 plus for BMI, physical activity level, alcohol intake, smoking status, fruit and vegetable intake, oily fish intake, high cholesterol level, hypertension, history of CVD, history of cancer, family history of CVD and family history of depression at baseline



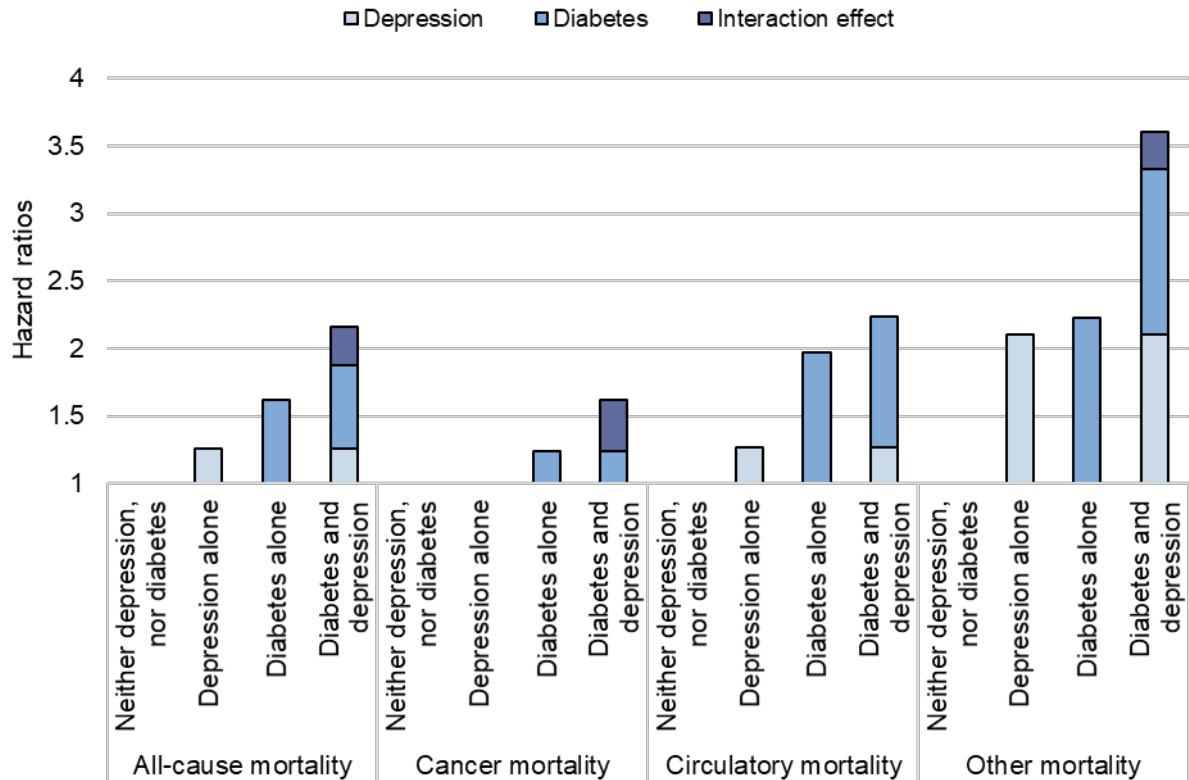

ESM Fig. 1: HRs (95% CIs) for all-cause and cause-specific mortality risk among UK Biobank participants with neither, one of both of depression and diabetes (fully adjusted models<sup>a</sup>)

<sup>a</sup> Fully adjusted model: adjusted for age, sex, ethnicity, education, income and area-based deprivation, BMI, physical activity level, alcohol intake, smoking status, fruit and vegetable intake, oily fish intake, high cholesterol level, hypertension, history of CVD, history of cancer, family history of CVD and family history of depression at baseline

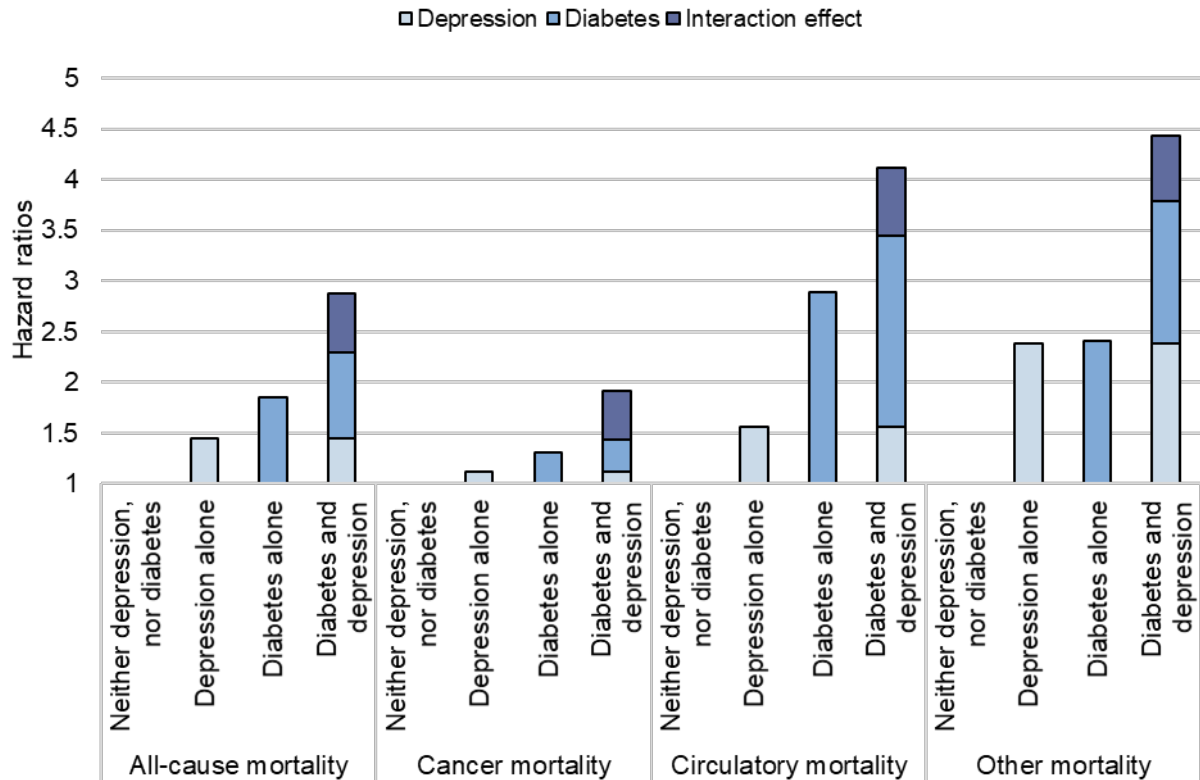

ESM Fig. 2: HRs (95% CI) for all-cause and cause-specific mortality among UK Biobank participants with neither, one of both of depression and diabetes (partially adjusted models\*)

a Partially adjusted model: adjusted for age, sex, ethnicity, education, income and area-based deprivation
